# Supplementary material for: Early-Life Conditions and Cognitive Function in Middle-and Old-Aged Chinese Adults: A Longitudinal Study
Source: PubMed Central journal article supplement (PMC7277849; doi:10.3390/ijerph17103451), 2020-05-15
Supplement: ijerph-17-03451-s001.pdf [file ijerph-17-03451-s001.pdf]

# Early-Life Conditions and Cognitive Function in Middle- and Old-Aged Chinese Adults: A Longitudinal Study

Lei Yang<sup>1</sup> and Zhenbo Wang<sup>2,\*</sup>

<sup>1</sup> School of Ethnology and Sociology, Minzu University of China, Beijing 100081, China; lei.yang@muc.edu.cn

<sup>2</sup> Institute of Geographic Sciences and Natural Resources Research, Chinese Academy of Sciences, Beijing 100101, China

\* Correspondence: wangzb@igsnr.ac.cn

Received: 28 March 2020; Accepted: 13 May 2020; Published: date

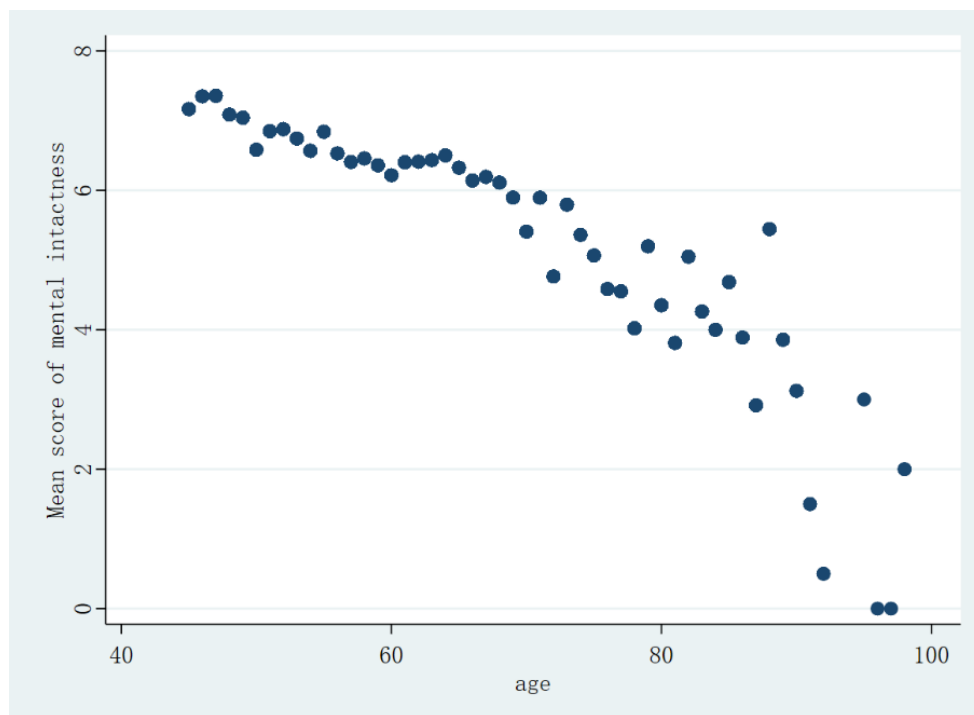

**Figure S1.** Correlation of age and mental intactness (mean scores) in 2011.

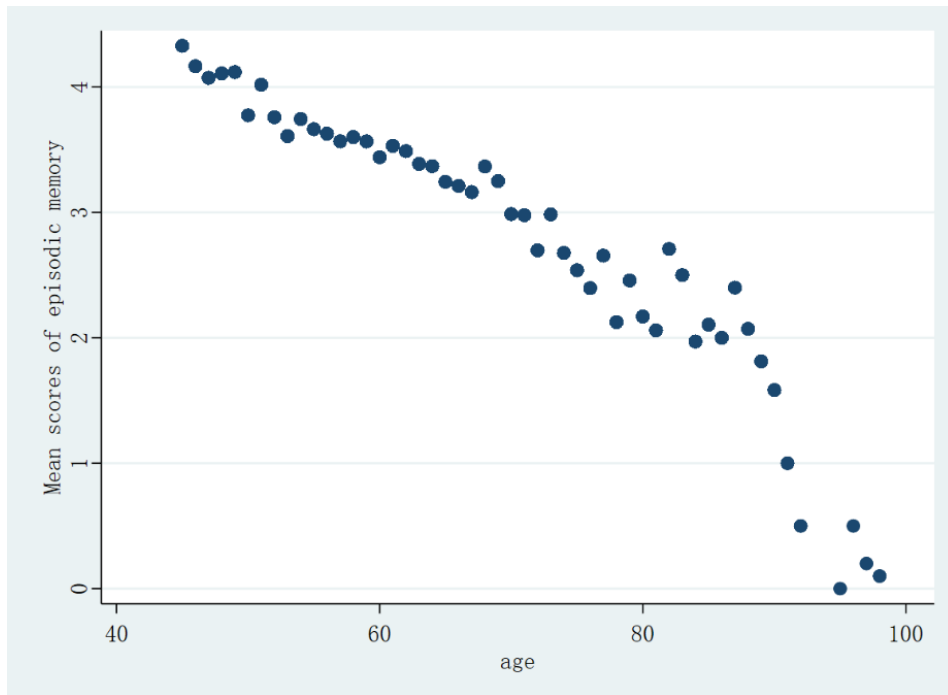

**Figure S2.** Correlation of age and episodic memory (mean scores) in 2011.
